# Supplementary material for: Tumor-Agnostic Circulating Tumor DNA Testing for Monitoring Muscle-Invasive Bladder Cancer
Source: MDPI journal article supplement (doi:10.3390/ijms242316578), 2023-11-21

## SUPPLEMENTARY TABLES

**Table S1. Mean MAF of *TERT* c.1-124C>T and *ATM* c.1236-2A>T in (A) progressive and non-progressive MIBC patients and (B) patients who died due to BC at the different follow-up time points.**

A)

|                           | Cystectomy            |                            | 1 month                |                            | 4 months               |                            | 12 months             |                            |
|---------------------------|-----------------------|----------------------------|------------------------|----------------------------|------------------------|----------------------------|-----------------------|----------------------------|
|                           | Progressive<br>(N=10) | Non-Progressive<br>(N= 32) | Progressive<br>(N= 10) | Non-Progressive<br>(N= 32) | Progressive<br>(N= 10) | Non-Progressive<br>(N= 32) | Progressive<br>(N= 6) | Non-Progressive<br>(N= 31) |
| <i>TERT</i><br>c.-124C>T  | 0.53*<br>(N= 7)       | 0.13*<br>(N= 11)           | 0.23<br>(N= 3)         | 0.15<br>(N= 7)             | 0.41<br>(N= 6)         | 0.13<br>(N= 14)            | 2.93*<br>(N= 4)       | 0.06*<br>(N= 8)            |
| <i>ATM</i><br>c.1236-2A>T | 0.17<br>(N= 3)        | 0.05<br>(N= 5)             | 0.00<br>(N= 0)         | 0.04<br>(N= 6)             | 0.04<br>(N= 1)         | 0.02<br>(N= 3)             | 0.15<br>(N= 3)        | 0.00<br>(N= 0)             |

\*There were significant differences ( $p<0.05$ ) between progressive and non-progressive patients.

B)

|                           | Cystectomy                |                                  | 1 month                   |                                  | 4 months                  |                                  | 12 months                 |                                  |
|---------------------------|---------------------------|----------------------------------|---------------------------|----------------------------------|---------------------------|----------------------------------|---------------------------|----------------------------------|
|                           | CSD<br>Patients<br>(N= 6) | Remaining<br>Patients<br>(N= 36) | CSD<br>Patients<br>(N= 6) | Remaining<br>Patients<br>(N= 36) | CSD<br>Patients<br>(N= 6) | Remaining<br>Patients<br>(N= 36) | CSD<br>Patients<br>(N= 2) | Remaining<br>Patients<br>(N= 35) |
| <i>TERT</i><br>c.-124C>T  | 0.65*<br>(N= 5)           | 0.15*<br>(N= 13)                 | 0.33<br>(N= 2)            | 0.15<br>(N= 8)                   | 0.58<br>(N= 4)            | 0.13<br>(N= 16)                  | 8.46*<br>(N= 2)           | 0.08*<br>(N= 10)                 |
| <i>ATM</i><br>c.1236-2A>T | 0.26<br>(N= 2)            | 0.05<br>(N= 6)                   | 0.00<br>(N= 0)            | 0.03<br>(N= 6)                   | 0.00<br>(N= 0)            | 0.03<br>(N= 4)                   | 0.00<br>(N= 0)            | 0.02<br>(N= 3)                   |

Remaining patients: patients alive or dead due to non-tumor causes.

Abbreviation: CSD, cancer-specific death

\*There were significant differences ( $p<0.05$ ) between CSD and the remaining patients.

## SUPPLEMENTARY FIGURES

**Figure S1. Percentage of patients presenting *TERT* or *ATM* mutations in cfDNA samples at different follow-up time points.**

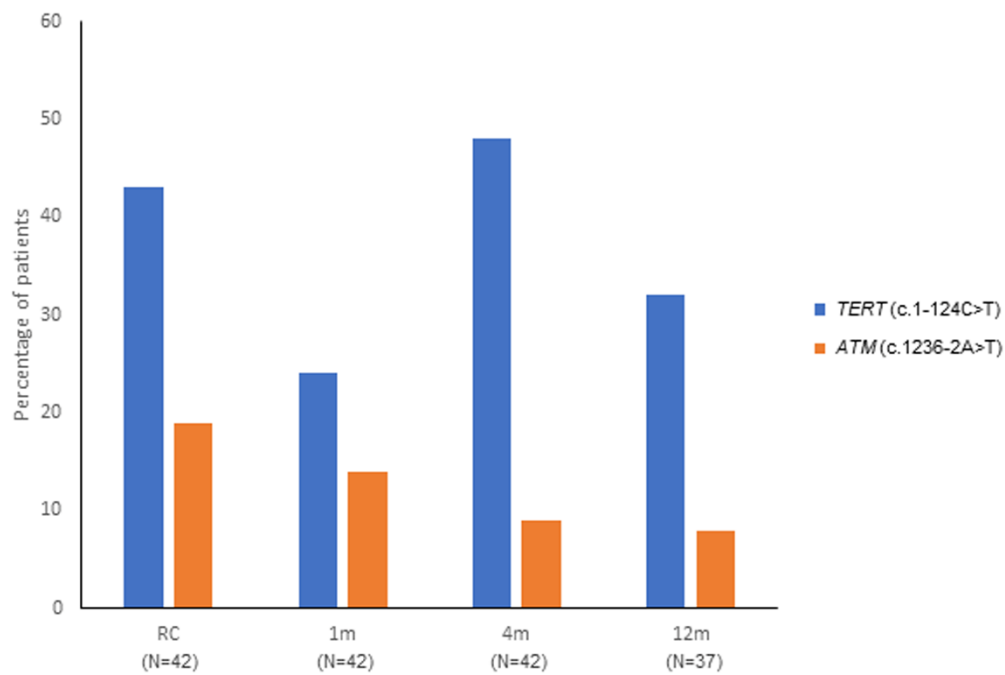

Abbreviations: RC; radical cystectomy, 1m; 1 month after RC, 4m; 4 months after RC, 12m; 12 months after RC.

**Figure S2. Mean MAF of *TERT* c.1-124C>T in MIBC patients according to (A) tumor progression and (B) death occurrence at each follow-up time point.**

A)

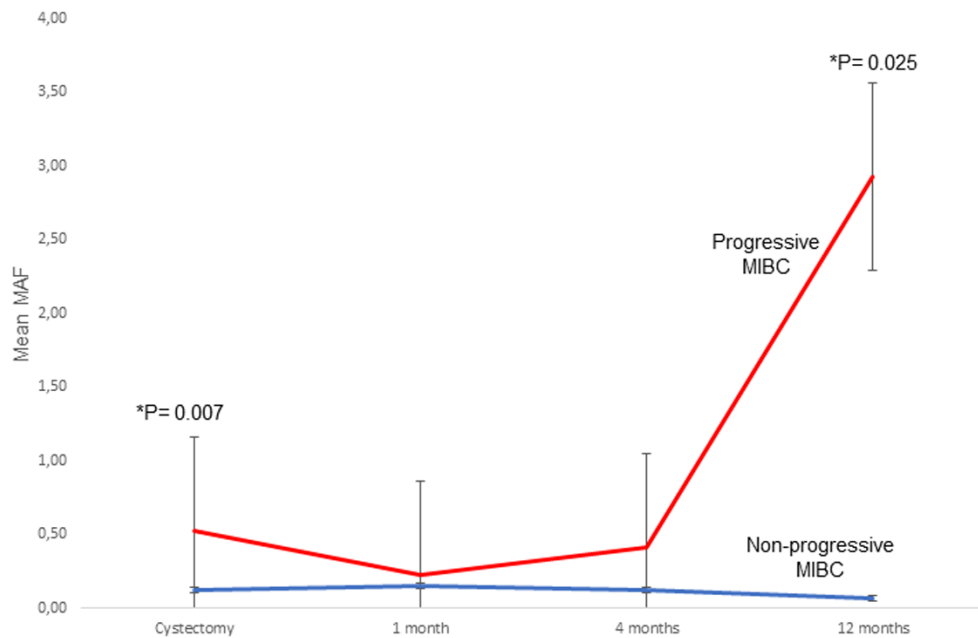

B)

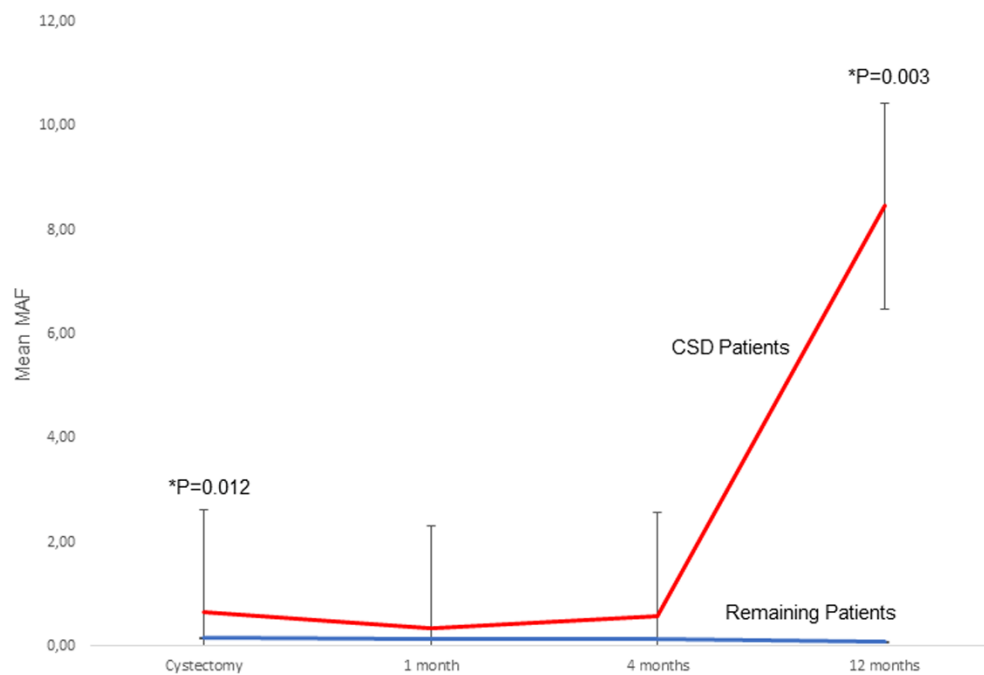

Remaining patients: patients alive or dead due to non-tumor causes.

Abbreviation: CSD, cancer-specific death; MAF, mutation allele fraction.

**Figure S3. Prognostic value of the *TERT* c.1-124C>T mutation at different time points.** Kaplan-Meier survival analysis shows the probability of tumor progression in MIBC patients stratified by *TERT* mutation status (positive or negative) (A) at baseline and (B) four months after RC. It also shows the probability of cancer-specific survival in MIBC patients stratified by *TERT* mutation status (positive or negative) (C) at baseline and (D) four months after RC. The MAF of *TERT* c.1-124C>T above or below the cut-off is considered positive or negative, respectively.

A)

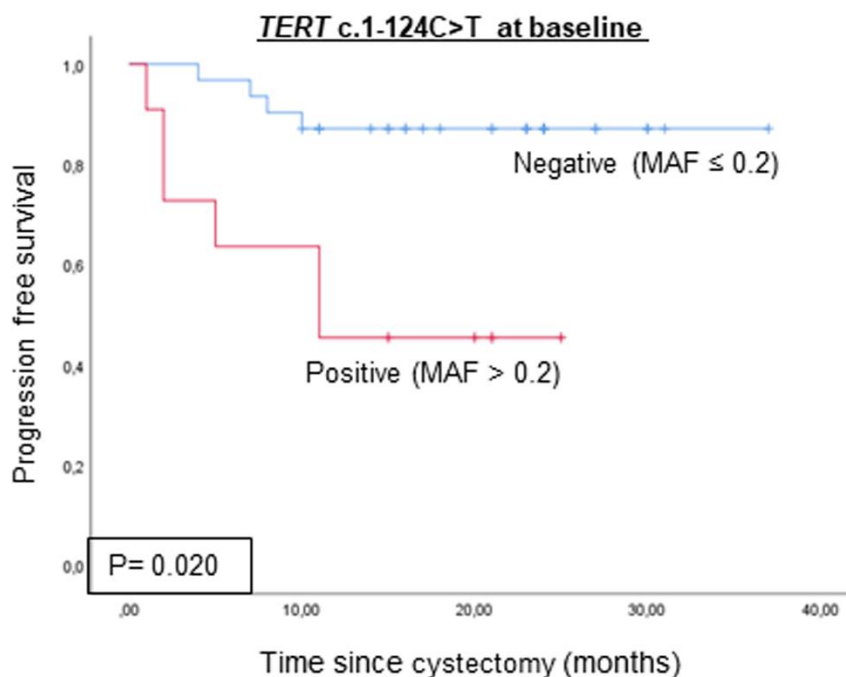

B)

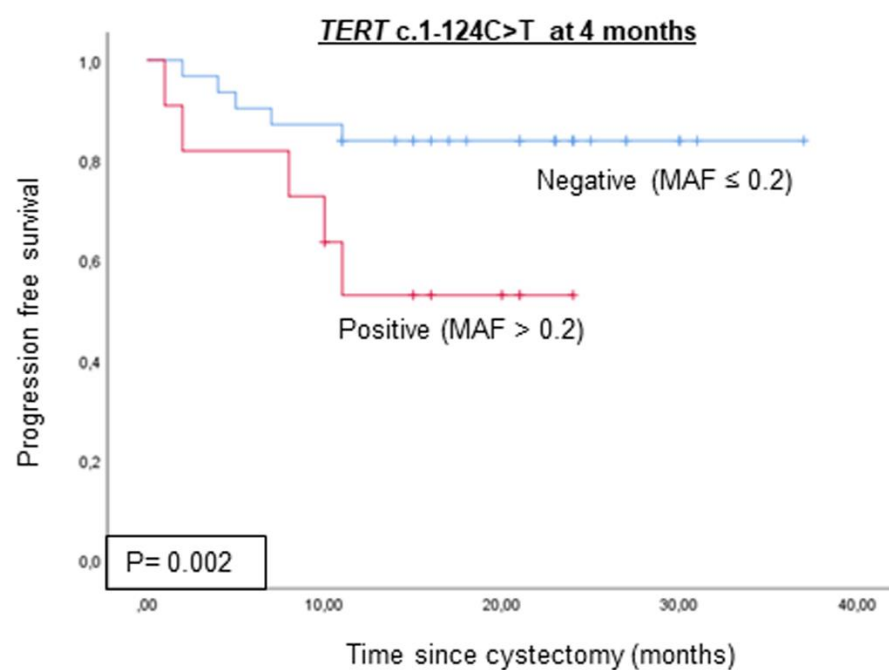

C)

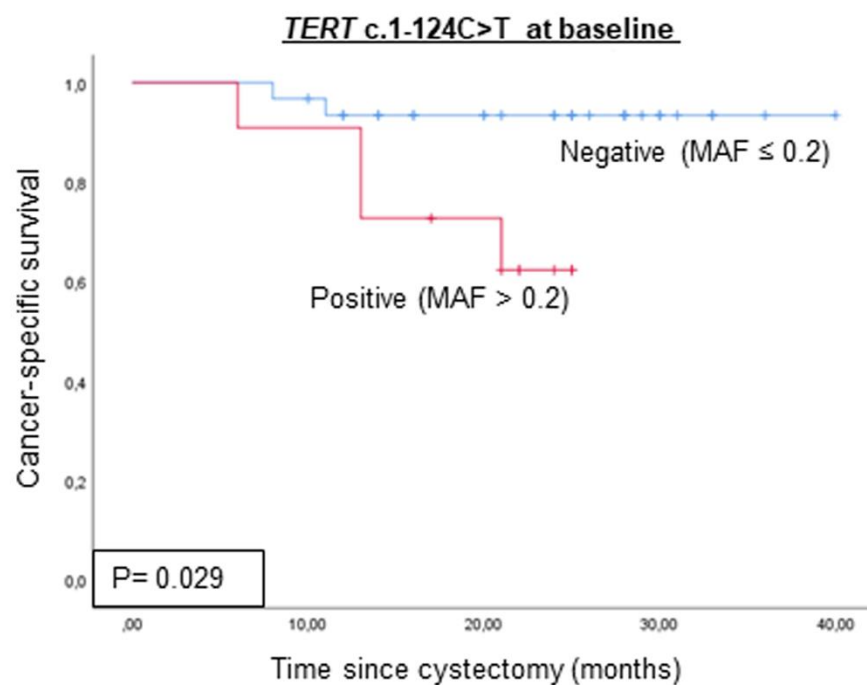

D)

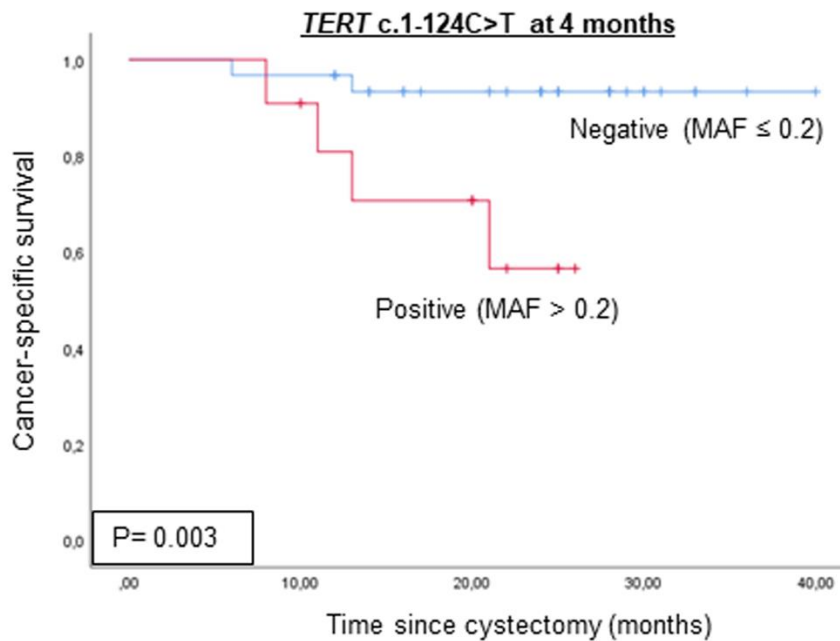

Abbreviations: MAF, mutation allele fraction.

**Figure S4. Representative two-dimensional (2D) scatter spot plots of ddPCR results analyzed through the QuantaSoft Analysis Pro Software (Bio-Rad).** The 2D amplitude plots show an example of both mutated and non-mutated samples for (A) the *TERT* c.1-124C>T assay and (B) the *ATM* c.1236-2A>T assay. The y-axis shows the fluorescence amplitude of the FAM probe (Channel 1), designed to hybridize only with the wild-type allele (blue). The HEX probe, which hybridizes only with the mutant allele (green), is plotted on the x-axis (Channel 2). Double-positive droplets carrying both mutant and wild-type alleles are represented in orange, while double-negative droplets (no amplification) are shown in grey.

A) *TERT* c.1-124C>T

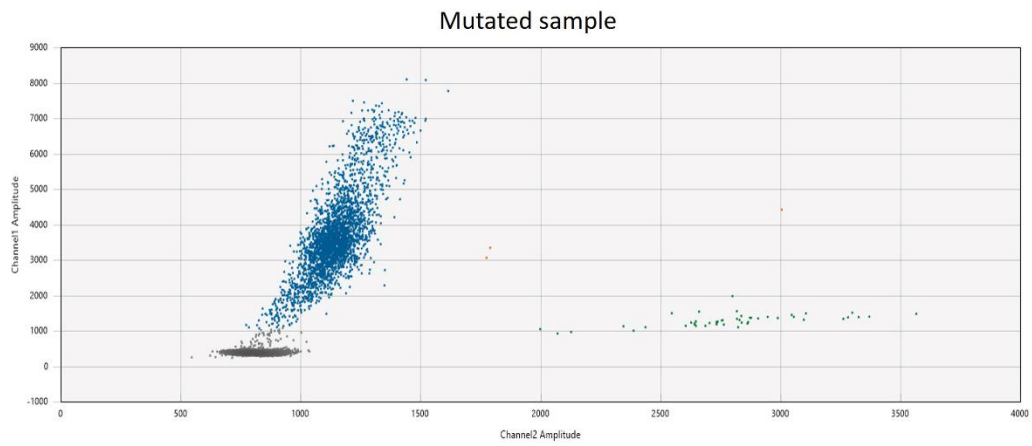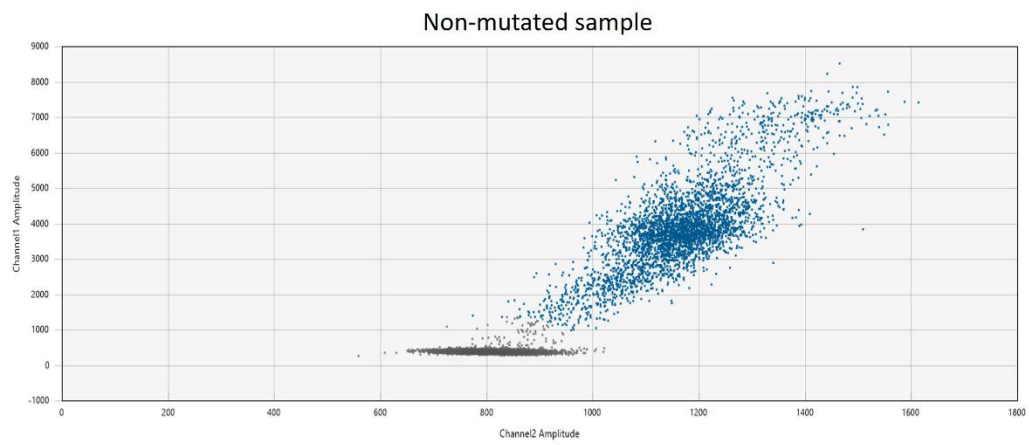

B) *ATM* c.1236-2A>T

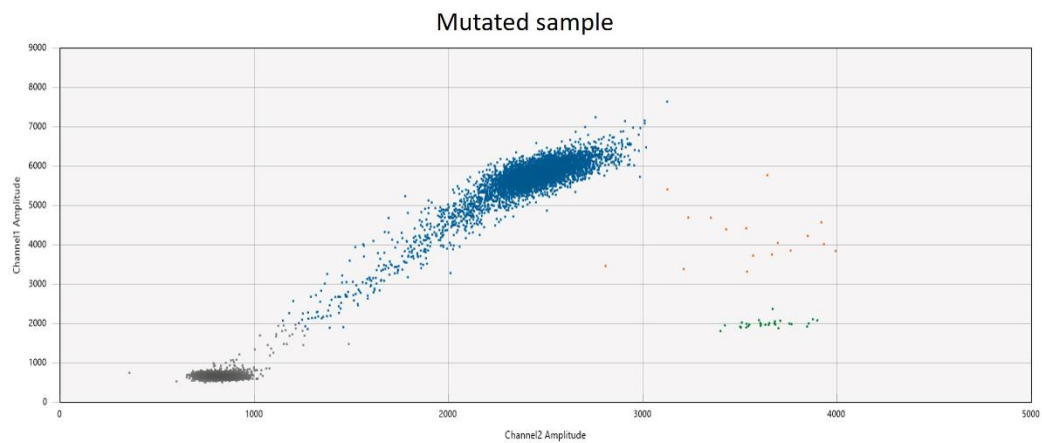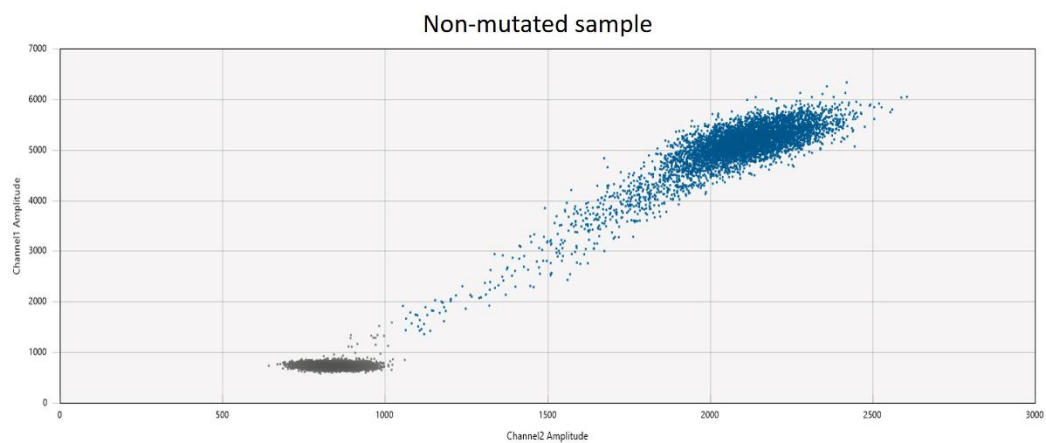

Supplement: s1 [file s1]
